# Supplementary material for: Encapsulating Ir nanoparticles into UiO-66 for photo-thermal catalytic CO2methanation under ambient pressure
Source: Royal Society of Chemistry journal article supplement (doi:10.1039/d2ta00933a), 2022-01-01
Supplement: d2ta00933a1.pdf [file d2ta00933a1.pdf]

## Supporting Information

### Encapsulating Ir Nanoparticles into UiO-66 for Photo-thermal Catalytic CO<sub>2</sub>

#### Methanation under Ambient Pressure

Yunxiang Tang<sup>a</sup>, Zhengyi Yang<sup>a</sup>, Chan Guo<sup>a</sup>, Hecheng Han<sup>a</sup>, Yanyan Jiang<sup>a, b, \*</sup>, Zhou Wang<sup>a</sup>, Jiurong Liu<sup>a, \*</sup>, Lili Wu<sup>a</sup>, Fenglong Wang<sup>a, b, \*</sup>

<sup>a</sup> Key Laboratory for Liquid-Solid Structural Evolution and Processing of Materials Ministry of Education, Shandong University, Jinan 250061, P. R. China

<sup>b</sup> Shenzhen Research Institute of Shandong University, Shenzhen, Guangdong, 518057, China

#### \*Corresponding Authors' Emails:

yanyan.jiang@sdu.edu.cn (Y.Y.J)

[jrliu@sdu.edu.cn](mailto:jrliu@sdu.edu.cn) (J.R.L)

fenglong.wang@sdu.edu.cn (F.L.W)

**Table S1.** The Ir loadings in the Ir@UiO-66 catalysts confirmed by ICP-OES.

| Entry | Catalyst    | Ir loading (wt%) |
|-------|-------------|------------------|
| 1     | Ir@UiO-66-1 | 0.07             |
| 2     | Ir@UiO-66-2 | 0.14             |
| 3     | Ir@UiO-66-3 | 0.26             |
| 4     | Ir/UiO-66-2 | 0.11             |

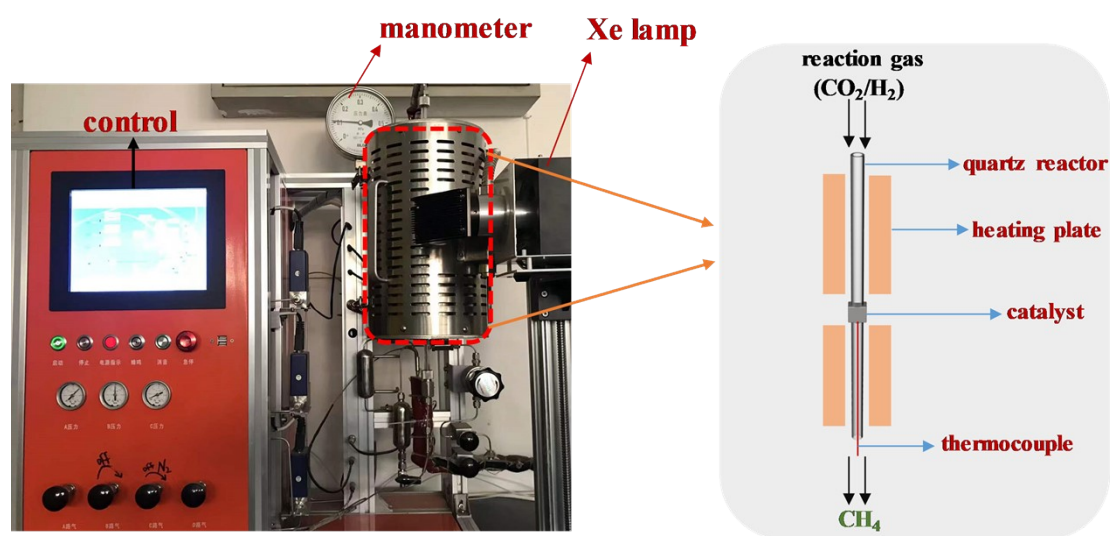

**Fig. S1.** Digital image of equipment for the photo-thermal CO<sub>2</sub> hydrogenation and the schematic illustration of the reactor.

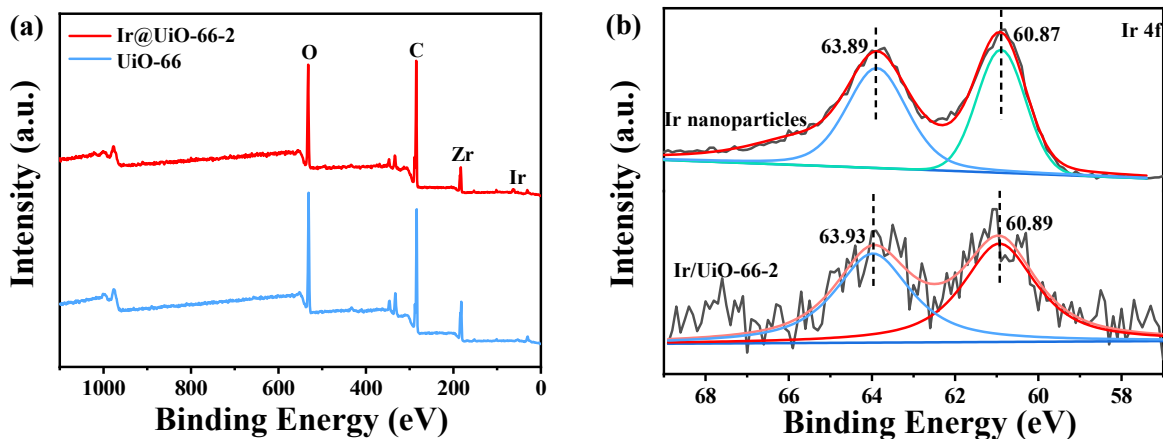

**Fig. S2.** (a) XPS survey spectra of UiO-66 and Ir@UiO-66; (b) XPS core-level spectra of Ir 4f of Ir nanoparticles and Ir/UiO-66-2.

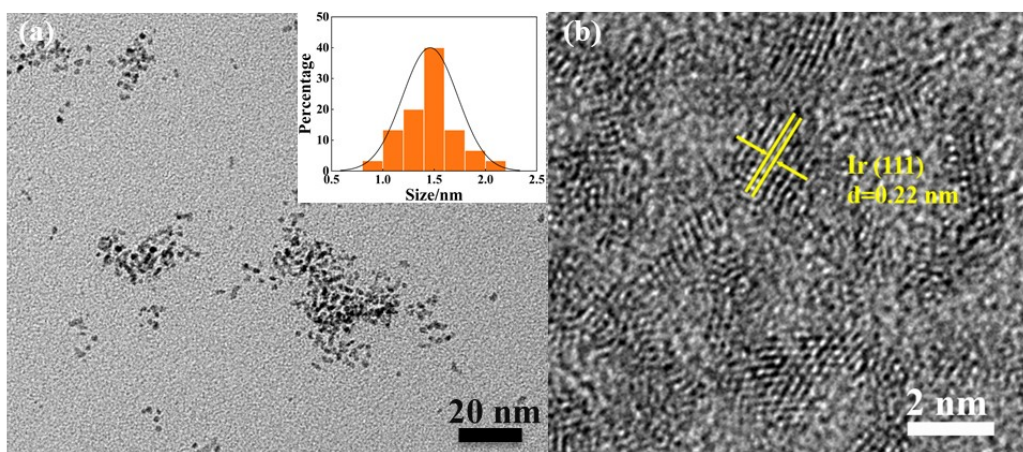

**Fig. S3.** (a) TEM image and the size distribution histogram (inset) of Ir nanoparticles; (b) HRTEM image of the Ir nanoparticles.

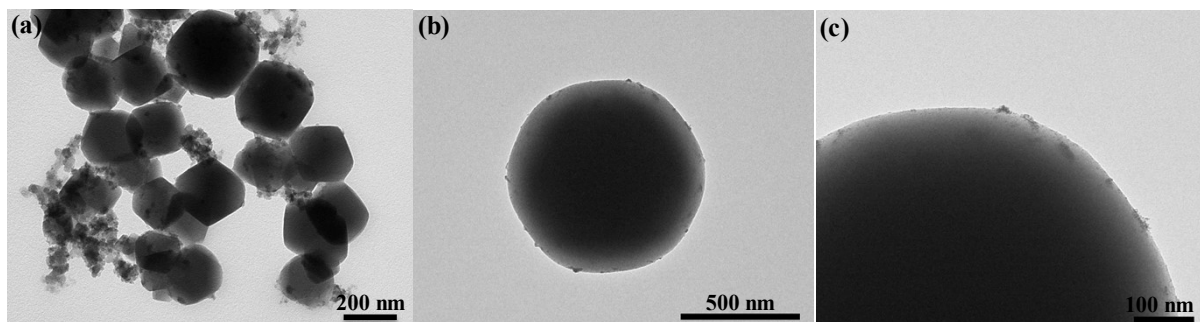

**Fig. S4.** TEM images of (a) Ir@UiO-66-2 without PVP and (b-c) Ir/UiO-66-2.

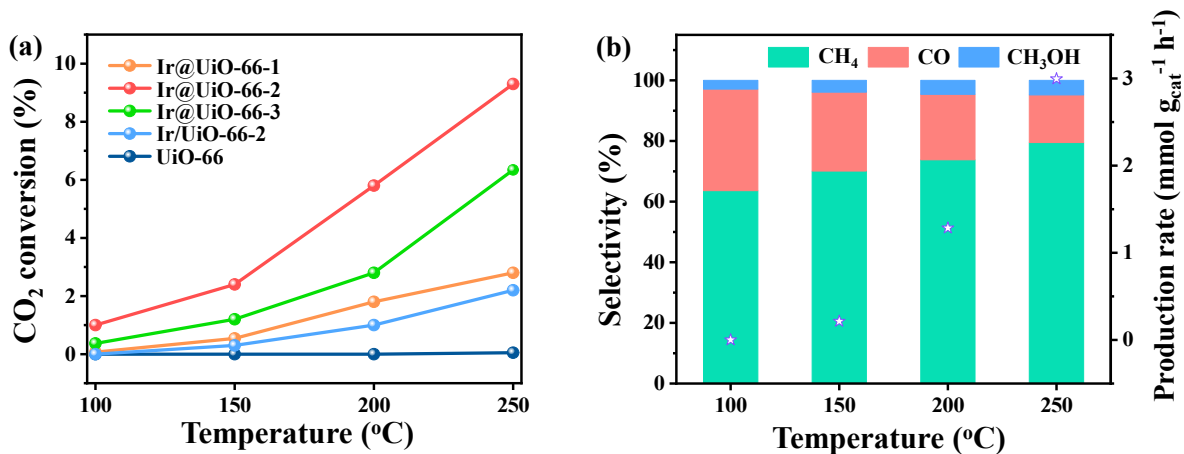

**Fig. S5.** (a) CO<sub>2</sub> conversion rate of UiO-66, Ir@UiO-66 and Ir/UiO-66 catalysts at different temperatures, (b) product selectivity and CH<sub>4</sub> yield rate of Ir@UiO-66-2 catalyst at different temperatures in dark.

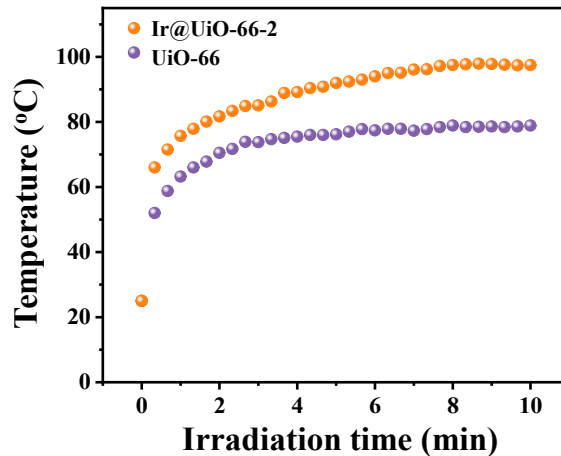

**Fig. S6.** Temperature profiles of UiO-66 and Ir@UiO-66-2 under light irradiation.

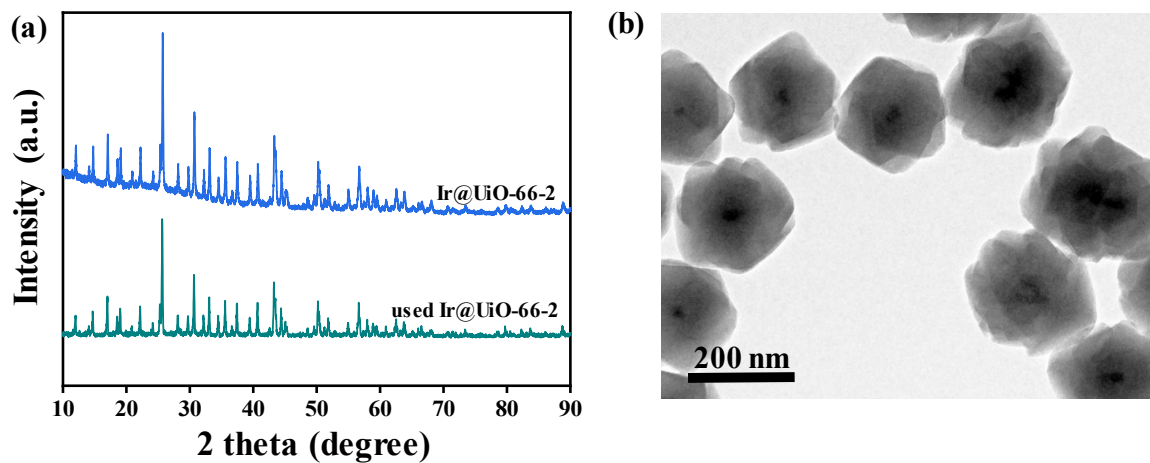

**Fig. S7.** (a) XRD patterns of Ir@UiO-66-2 before and after CO<sub>2</sub> hydrogenation test;

(b) TEM image of Ir@UiO-66-2 after CO<sub>2</sub> hydrogenation test.

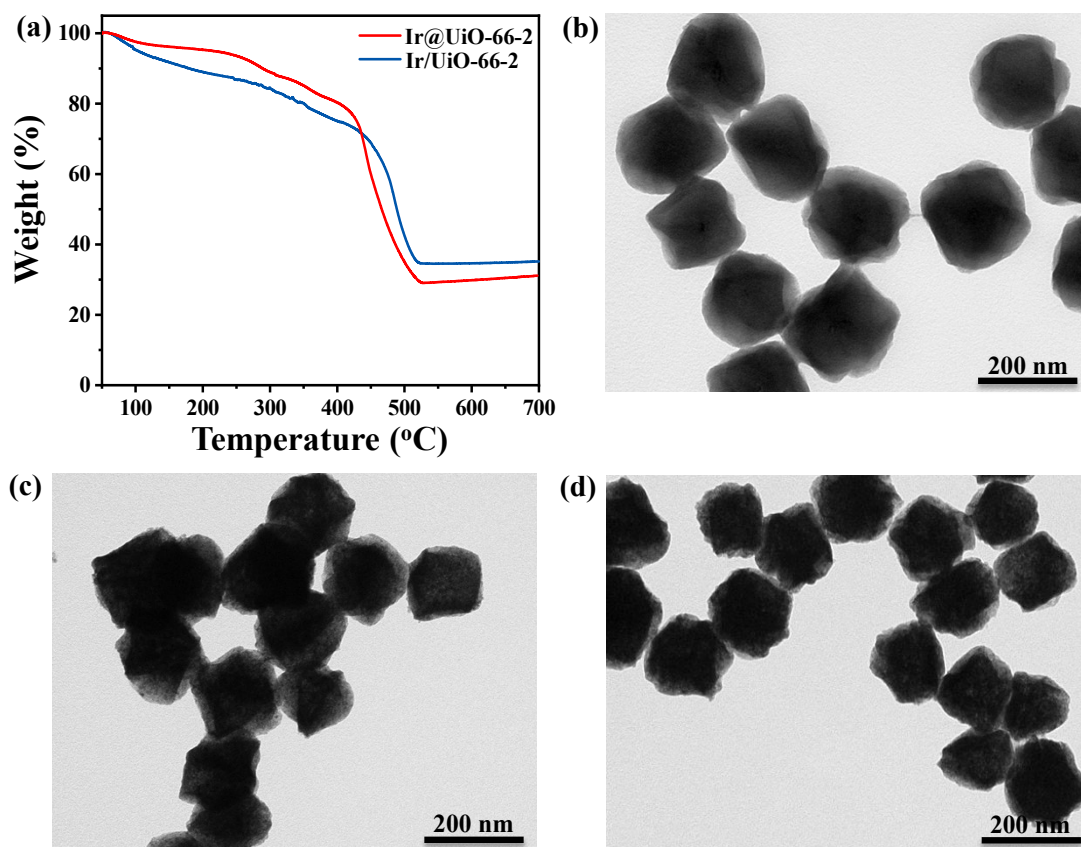

**Fig. S8.** TGA curves of UiO-66, Ir@UiO-66-2 and Ir/UiO-66-2; (b-c) TEM images of

Ir@UiO-66 calcined for 2 h in nitrogen at 400 °C, 450 °C and 500 °C, respectively.

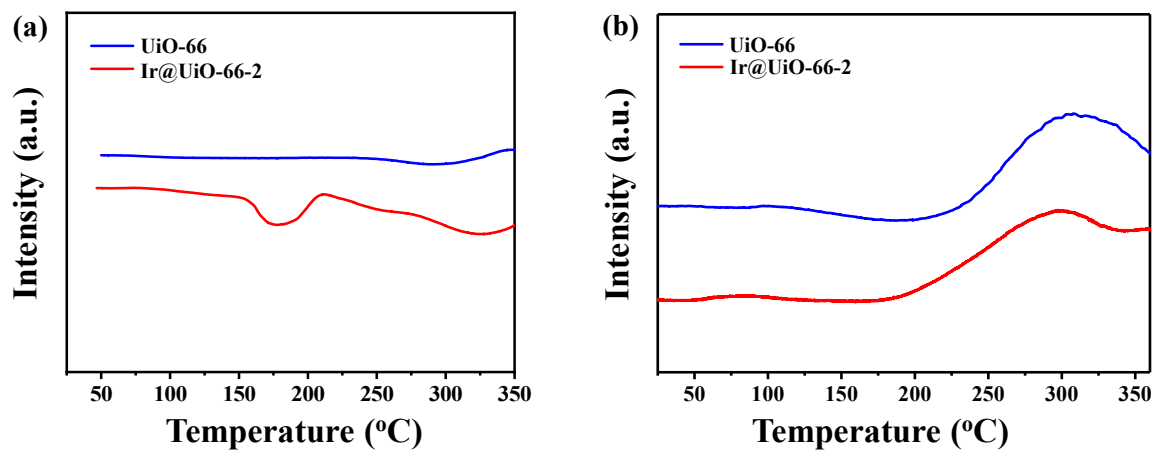

Fig. S9. (a) H<sub>2</sub>-TPR and (b) CO<sub>2</sub>-TPD profiles of UiO-66 and Ir@UiO-66-2.

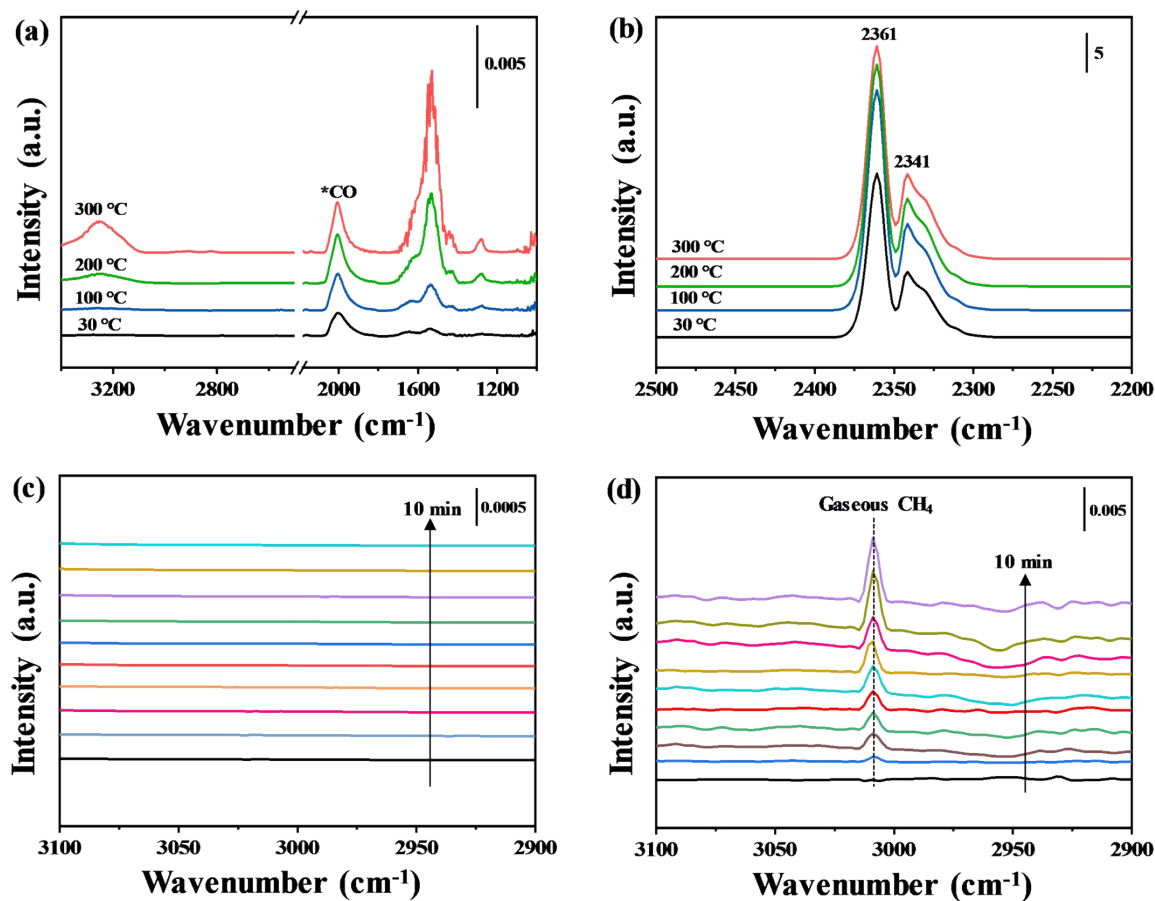

Fig. S10. (a-b) *In situ* DRIFTS spectra of Ir@UiO-66-2 catalyst under exposure to the mixture of H<sub>2</sub> and CO<sub>2</sub> (2:1) from 30 °C to 300 °C; *In situ* DRIFTS spectra of Ir@UiO-66-2 catalyst in dark (c) and under light irradiation (d) at 300 °C for 10 min.
